# Supplementary material
Source: Springer Nature journal article supplement (https://www.springermedizin.de/resource/supplementary/13049_2013_706_MOESM3_ESM.pdf/9666940)
Supplement: MOESM3 [file 9666940]

### Additional file 3

Rognås et al., "Refraining from pre-hospital advanced airway management: a prospective observational study from an anaesthesiologist-staffed pre-hospital critical care service."

#### Non-cardiac arrest patients with an initial GSC<9 where pre-hospital advanced airway management (PHAAM) where not performed

| Patient category          | PHAAM not performed Number(%) | Physicians' reasons for not performing PHAAM                                                                                |                          | Alternative airway management method used                                                                                                                                                                                  |                        |
|---------------------------|-------------------------------|-----------------------------------------------------------------------------------------------------------------------------|--------------------------|----------------------------------------------------------------------------------------------------------------------------------------------------------------------------------------------------------------------------|------------------------|
|                           |                               | Number*                                                                                                                     | Number                   | Number                                                                                                                                                                                                                     | Number                 |
| Trauma (n=134)            | 9 (6.7)                       | Patients condition<br>Short transport time to ED**<br>Expected difficult PHETI***                                           | 8<br>2<br>1              | Spontaneous respiration, no assistance<br>Spontaneous respiration+ oropharyngeal airway<br>Bag-mask ventilation, no adjuncts<br>Bag-mask ventilation+oropharyngeal airway                                                  | 2<br>1<br>4<br>2       |
| SAH**** / stroke (n=70)   | 28 (40.0)                     | Patients condition<br>Co-morbidity<br>Short transport time to ED<br>Expected difficult PHETI<br>Difficult access to patient | 13<br>15<br>10<br>3<br>1 | Spontaneous respiration, no assistance<br>Spontaneous respiration+ jaw thrust /chin lift<br>Spontaneous respiration+ oropharyng. airway<br>Bag-mask ventilation, no adjuncts<br>Bag-mask ventilation+ oropharyngeal airway | 12<br>5<br>5<br>3<br>3 |
| Asthma / COPD***** (n=30) | 9 (30.0)                      | Patients condition<br>Co-morbidity                                                                                          | 4<br>6                   | Spontaneous respiration, no assistance<br>Bag-mask ventilation, no adjuncts<br>Bag-mask ventilation+ oropharyngeal airway                                                                                                  | 2<br>4<br>3            |
| Cardiology (n=8)          | 4 (50.0)                      | Patients condition<br>Short transport time to ED<br>Expected difficult PHETI                                                | 3<br>1<br>1              | Spontaneous respiration, no assistance<br>Spontaneous respiration+ jaw thrust /chin lift<br>Bag-mask ventilation, no adjuncts                                                                                              | 1<br>1<br>2            |

\* More than one reason may apply to each patient

\*\* Emergency Department

\*\*\*Pre-hospital Endotracheal intubation

\*\*\*\*Subarachnoid Haemorrhage

\*\*\*\*\*Chronic Obstructive Pulmonary Disease

#### Pre-hospital critical care anaesthesiologists' reasons for not performing pre-hospital advanced airway management on cardiac arrest patients (n=271).

| Reason for not performing PHAAM* | Number** | %    |
|----------------------------------|----------|------|
| Patients condition               | 157      | 57.9 |
| Co-morbidity                     | 57       | 21.0 |
| Short transport time to ED***    | 16       | 5.9  |
| Expected difficult PHETI ****    | 4        | 1.5  |
| Difficult access to patient      | 2        | 0.7  |
| Lack of training                 | 0        |      |
| Lack of equipment                | 0        |      |
| Lack of assistance               | 0        |      |
| Data missing                     | 68       | 25.1 |

\*Pre-hospital advanced airway management

\*\* More than one reason may apply to each patient

\*\*\* Emergency Department

\*\*\*\* Pre-hospital Endotracheal Intubation

### Additional file 3

Rognås et al., "Refraining from pre-hospital advanced airway management: a prospective observational study from an anaesthesiologist-staffed pre-hospital critical care service."

#### Patient categories when pre-hospital advanced airway management (PHAAM) were withheld

| Reason for withholding PHAAM                  | Patient category*                              | Numbers (%) |
|-----------------------------------------------|------------------------------------------------|-------------|
| <b>The patient's condition</b><br>(n=257)     | Trauma                                         | 11 (4.3)    |
|                                               | Cardiac arrest (CA)                            | 157 (61.1)  |
|                                               | Cardiological disease (not CA)                 | 24 (9.3)    |
|                                               | Asthma / Chronic Obstructive Pulmonary Disease | 13 (5.1)    |
|                                               | Oto-rhino-laryngological disease               | 0           |
|                                               | Subarachnoid haemorrhage / stroke              | 16 (6.2)    |
|                                               | Other                                          | 51 (19.8)   |
| <b>Patient comorbidity</b><br>(n=107)         | Trauma                                         | 2 (1.9)     |
|                                               | Cardiac arrest (CA)                            | 57 (53.3)   |
|                                               | Cardiological disease (not CA)                 | 5 (4.7)     |
|                                               | Asthma / Chronic Obstructive Pulmonary Disease | 18 (16.8)   |
|                                               | Oto-rhino-laryngological disease               | 0           |
|                                               | Subarachnoid haemorrhage / stroke              | 18 (16.2)   |
|                                               | Other                                          | 16 (15.0)   |
| <b>Short transport time to ED**</b><br>(n=64) | Trauma                                         | 8 (12.5)    |
|                                               | Cardiac arrest (CA)                            | 16 (25.0)   |
|                                               | Cardiological disease (not CA)                 | 4 (6.3)     |
|                                               | Asthma / Chronic Obstructive Pulmonary Disease | 7 (10.9)    |
|                                               | Oto-rhino-laryngological disease               | 1 (1.6)     |
|                                               | Subarachnoid haemorrhage / stroke              | 13 (20.3)   |
|                                               | Other                                          | 24 (37.5)   |
| <b>Expected difficult PHETI***</b><br>(n=19)  | Trauma                                         | 5 (26.3)    |
|                                               | Cardiac arrest (CA)                            | 4 (21.1)    |
|                                               | Cardiological disease (not CA)                 | 3 (15.8)    |
|                                               | Asthma / Chronic Obstructive Pulmonary Disease | 1 (5.3)     |
|                                               | Oto-rhino-laryngological disease               | 1 (5.3)     |
|                                               | Subarachnoid haemorrhage / stroke              | 3 (15.8)    |
|                                               | Other                                          | 6 (31.6)    |
| <b>Difficult access to patient</b><br>(n=4)   | Trauma                                         | 0           |
|                                               | Cardiac arrest (CA)                            | 2 (50.0)    |
|                                               | Cardiological disease (not CA)                 | 0           |
|                                               | Asthma / Chronic Obstructive Pulmonary Disease | 1 (25.0)    |
|                                               | Oto-rhino-laryngological disease               | 0           |
|                                               | Subarachnoid haemorrhage / stroke              | 1 (25.0)    |
|                                               | Other                                          | 1 (25.0)    |
| <b>No assistance available</b><br>(n=4)       | Trauma                                         | 1 (25.0)    |
|                                               | Cardiac arrest (CA)                            | 0           |
|                                               | Cardiological disease (not CA)                 | 1 (25.0)    |
|                                               | Asthma / Chronic Obstructive Pulmonary Disease | 0           |
|                                               | Oto-rhino-laryngological disease               | 1 (25.0)    |
|                                               | Subarachnoid haemorrhage / stroke              | 1 (25.0)    |
|                                               | Other                                          | 0           |
| <b>Insufficient equipment</b><br>(n=1)        | Trauma                                         | 0           |
|                                               | Cardiac arrest (CA)                            | 0           |
|                                               | Cardiological disease (not CA)                 | 0           |
|                                               | Asthma / Chronic Obstructive Pulmonary Disease | 0           |
|                                               | Oto-rhino-laryngological disease               | 1 (100.0)   |
|                                               | Subarachnoid haemorrhage / stroke              | 0           |
|                                               | Other                                          | 0           |

\*Patients may fall into more than one category

\*\* Emergency Department

\*\*\*Pre-hospital Endotracheal Intubation

### Additional file 3

Rognås et al., "Refraining from pre-hospital advanced airway management: a prospective observational study from an anaesthesiologist-staffed pre-hospital critical care service."

#### Alternative methods used to treat the patient when pre-hospital advanced airway management (PHAAM) were withheld or postponed

| Reason for withholding PHAAM*                 | Alternative methods used                                                                                                                                                                                                                                             | Numbers (%)                                                               |
|-----------------------------------------------|----------------------------------------------------------------------------------------------------------------------------------------------------------------------------------------------------------------------------------------------------------------------|---------------------------------------------------------------------------|
| <b>The patient's condition</b><br>(n=257)     | Spontaneous respiration, no assistance<br>Spontaneous respiration with jaw thrust /chin lift<br>Spontaneous respiration with oropharyngeal airway<br>Bag-valve-mask ventilation, no adjuncts<br>Bag-valve-mask ventilation with oropharyngeal airway<br>Missing data | 47 (18.3)<br>6 (2.3)<br>16 (6.2)<br>124 (48.2)<br>50 (19.5)<br>14 (5.4)   |
| <b>Patient comorbidity</b><br>(n=107)         | Spontaneous respiration, no assistance<br>Spontaneous respiration with jaw thrust /chin lift<br>Spontaneous respiration with oropharyngeal airway<br>Bag-valve-mask ventilation, no adjuncts<br>Bag-valve-mask ventilation with oropharyngeal airway<br>Missing data | 21 (19.6)<br>5 (4.7)<br>11 (10.3)<br>46 (43.0)<br>22 (20.6)<br>2 (1.9)    |
| <b>Short transport time to ED**</b><br>(n=64) | Spontaneous respiration, no assistance<br>Spontaneous respiration with jaw thrust /chin lift<br>Spontaneous respiration with oropharyngeal airway<br>Bag-valve-mask ventilation, no adjuncts<br>Bag-valve-mask ventilation with oropharyngeal airway<br>Missing data | 15 (23.4)<br>10 (15.6)<br>6 (9.4)<br>22 (34.4)<br>10 (15.6)<br>1 (1.6)    |
| <b>Expected difficult PHETI***</b><br>(n=19)  | Spontaneous respiration, no assistance<br>Spontaneous respiration with jaw thrust /chin lift<br>Spontaneous respiration with oropharyngeal airway<br>Bag-valve-mask ventilation, no adjuncts<br>Bag-valve-mask ventilation with oropharyngeal airway<br>Missing data | 4 (21.1)<br>2 (10.5)<br>2 (10.5)<br>6 (31.6)<br>3 (15.8)<br>2 (10.5)      |
| <b>Difficult access to patient</b><br>(n=4)   | Spontaneous respiration, no assistance<br>Spontaneous respiration with jaw thrust /chin lift<br>Spontaneous respiration with oropharyngeal airway<br>Bag-valve-mask ventilation, no adjuncts<br>Bag-valve-mask ventilation with oropharyngeal airway<br>Missing data | 1 (25.0)<br>0<br>0<br>1 (25.0)<br>2 (50.0)<br>0                           |
| <b>No assistance available</b><br>(n=4)       | Spontaneous respiration, no assistance<br>Spontaneous respiration with jaw thrust /chin lift<br>Spontaneous respiration with oropharyngeal airway<br>Bag-valve-mask ventilation, no adjuncts<br>Bag-valve-mask ventilation with oropharyngeal airway<br>Missing data | 0<br>2 (50.0)<br>0<br>0<br>1 (25.0)<br>1 (25.0)                           |
| <b>Insufficient equipment</b><br>(n=1)        | Spontaneous respiration, no assistance<br>Spontaneous respiration with jaw thrust /chin lift<br>Spontaneous respiration with oropharyngeal airway<br>Bag-valve-mask ventilation, no adjuncts<br>Bag-valve-mask ventilation with oropharyngeal airway<br>Missing data | 1 (100.0)<br>0<br>0<br>0<br>0<br>0                                        |
| <b>In total</b><br>(n=456)                    | Spontaneous respiration, no assistance<br>Spontaneous respiration with jaw thrust /chin lift<br>Spontaneous respiration with oropharyngeal airway<br>Bag-valve-mask ventilation, no adjuncts<br>Bag-valve-mask ventilation with oropharyngeal airway<br>Missing data | 89 (26.6)<br>25 (7.2)<br>35 (10.1)<br>199 (57.3)<br>88 (25.4)<br>20 (5.8) |

\*Patients may fall into more than one category

\*\* Emergency Department

\*\*\*Pre-hospital Endotracheal Intubation
